# Supplementary material
Source: Research Square preprint supplement (doi:10.21203/rs.3.rs-9529903/v1)
Supplement: Supplementary file 1 [file 45ef40d4fb902d62cd02a40c.docx]

**Table 1**: Identification of proteins from ATCC 49619, T39, T19, T43, T28 and T20, their subcellular localisation and value of prediction for the protective antigen.

| Accession number | Protein name (Gene) | Theo/exp MW | Theo/exp calc. pI | Subcellular localisation | Overall Prediction for the Protective Antigena |
| --- | --- | --- | --- | --- | --- |
| Translation | | | | |  |
| A0A4H9T4H0 | 50S ribosomal protein L2 (rplB) | 29948/29900 | 10.69/10.68 | Cytoplasmic | 0.7491 |
| A0A089WYJ9 | 50S ribosomal protein L4 (rplD) | 22210/22200 | 10.12/10.13 | Cytoplasmic | 0.5395 |
| A0A4J1TNR8 | 50S ribosomal protein L10 (rplJ) | 17507/17500 | 5.08/5.12 | Cytoplasmic | 0.4747 |
| A0A4J2D804 | 50S ribosomal protein L22 (rplV) | 12258/12300 | 10.53/10.52 | Cytoplasmic | 0.5040 |
| A0A062WRE8 | 30S ribosomal protein S7 (rpsG) | 17756/17700 | 10.29/10.29 | Cytoplasmic | 0.6176 |
| A0A4J0IED5 | 50S ribosomal protein L18 (rplR) | 12858/12900 | 10.40/10.4 | Cytoplasmic | 0.5691 |
| A0A4L8HW49 | 50S ribosomal protein L16 (rplP) | 15462/15500 | 10.57/10.56 | Cytoplasmic | 0.5691 |
| A0A4J2EGS4 | Elongation factor Ts (tsf) | 37329/37300 | 4.81/4.89 | Cytoplasmic | 0.5025 |
| Transcription | | | | |  |
| A0A4J2ERC5 | DNA-directed RNA polymerase subunit beta' (rpoC) | 136936/136800 | 6.52/6.95 | Cytoplasmic | 0.4075 |
| A0A4J2F629 | DNA-directed RNA polymerase subunit alpha (rpoA) | 34221/34200 | 4.64/4.75 | Cytoplasmic | 0.5307 |
| Transport | | | | |  |
| A0A7U0IL92 | Maltodextrin-binding protein | 45425/45400 | 5.08/5.22 | Membrane | 0.4315 |
| A0A264SAK8 | ABC transporter substrate binding lipoprotein-branched chain amino acid transport (livJ) | 40473/40400 | 5.20/5.31 | Unknown | 0.6308 |
| A0A4J1USL6 | Iron-compound ABC transporter iron-compound-binding protein (yclQ) | 34863/34800 | 5.56/5.67 | Membrane | 0.5985 |
| A0A4M3K1B7 | ABC transporter, sugar transporter, sugar-binding lipoprotein-N-acetylneuraminate-binding protein (yesO_2) | 48330/48300 | 5.32/5.44 | Unknown | 0.5359 |
| A0A654VHF3 | Iron ABC transporter substrate-binding protein (yhfQ) | 37489/37500 | 5.38/5.54 | Unknown | 0.4331 |
| A0A654UCV1 | ABC transporter substrate-binding protein | 35240/35200 | 5.02/5.15 | Membrane | 0.7054 |
| A0A4J1RFP4 | Oligopeptide-binding protein AmiA (amiA) | 72407/72400 | 4.92/5.06 | Membrane | 0.5717 |
| A0A0T8YST1 | ABC transporter substrate-binding lipoprotein | 30627/30600 | 5.24/5.36 | Unknown | 0.5229 |
| Protein biosynthesis | | | | |  |
| B5E653 | Elongation factor Tu (tuf) | 43971/43900 | 4.86/4.97 | Cytoplasmic | 0.4565 |
| C1CDW0 | Endo-beta-N-acetylglucosaminidase | 65456/65400 | 5.17/5.34 | Extracellular | 0.3782 |
| J1DL42 | Elongation factor G (fusA) | 76835/76800 | 4.86/4.96 | Cytoplasmic | 0.5780 |
| Amino acid metabolism | | | | |  |
| A0A4I7HFG7 | Glutamine synthetase I alpha (glnA) | 50350/50300 | 4.93/5.05 | Cytoplasmic | 0.4733 |
| A0A0B7M5F8 | Phospho-2-dehydro-3-deoxyheptonate aldolase (aroF) | 38753/38700 | 5.05/5.16 | Cytoplasmic | 0.4154 |
| A0A0U0KBT2 | LysM domain protein (xlyA) | 22075/22100 | 4.45/4.5 | Unknown | 0.6178 |
| A0A0H2ZR49 | Glutamate dehydrogenase (gdhA) | 48796/48800 | 5.43/5.55 | Cytoplasmic | 0.4648 |
| Carbohydrate/ Sugar metabolism | | | | |  |
| A0A111NRZ8 | Enolase (eno) | 47132/47100 | 4.69/4.81 | Cell wall | 0.4841 |
| A0A4J2DG70 | Pyruvate kinase (pyk) | 54784/54800 | 5.04/5.15 | Cytoplasmic | 0.6062 |
| A0A0T8ZVV5 | Phosphoglycerate kinase (pgk) | 41909/41900 | 4.92/5.03 | Cytoplasmic | 0.4513 |
| A0A4P0AGH8 | 2,3-bisphosphoglycerate-dependent phosphoglycerate mutase (gpmA_1) | 26051/26000 | 5.14/5.31 | Cytoplasmic | 0.4482 |
| A0A822QWL7 | Glucose-6-phosphate isomerase (gpi) | 49878/49800 | 5/5.14 | Cytoplasmic | 0.4623 |
| A0A0T8W7F3 | Triosephosphate isomerase (tpiA) | 26492/26500 | 4.75/4.84 | Cytoplasmic | 0.5167 |
| A0A4J2B8R4 | Fructose-bisphosphate aldolase (fbaA) | 31360/31300 | 4.99/5.1 | Cytoplasmic | 0.3498 |
| A0A4J1VJ73 | Beta-galactosidase (lacZ) | 247143/247000 | 5.91/6.29 | Cell wall | 0.5858 |
| A0A0T8VVY1 | 6-phosphogluconate dehydrogenase, decarboxylating (cbpJ_2) | 52578/52500 | 4.95/5.1 | Cytoplasmic | 0.3838 |
| A0A4H9SK64 | L-lactate oxidase (lctO) | 41390/41400 | 5.58/5.91 | Cytoplasmic | 0.5324 |
| A0A558U153 | HPr kinase/phosphorylase (hprK) | 35404/35400 | 5.23/5.31 | Cytoplasmic | 0.3468 |
| A0A0T8TXW9 | Alpha-galactosidase (agaN) | 81798/81700 | 5.12/5.26 | Cytoplasmic | 0.4197 |
| A0A4J1XYK3 | Endo-alpha-N-acetylgalactosaminidase | 195775/195700 | 5.69/6 | Cell wall | 0.6189 |
| Nucleotide metabolism | | | | |  |
| A0A7X3BXL8 | Ribonuclease J (rnj) | 61147/61100 | 5.37/5.55 | Cytoplasmic | 0.3266 |
| A0A0U0CT68 | Single-stranded DNA-binding protein (ssbA) | 17352/17300 | 5.16/5.29 | Cytoplasmic | 0.5417 |
| Gene expression | | | | |  |
| A0A0T8ESR7 | Peptidyl-prolyl cis-trans isomerase | 29094/29100 | 5.34/5.55 | Extracellular | 0.6296 |
| Ion binding | | | | |  |
| A0A0Y3LU78 | Alcohol dehydrogenase (adh) | 38046/38000 | 5.24/5.45 | Cytoplasmic | 0.3999 |
| A0A4M9XRE1 | Probable manganese-dependent inorganic pyrophosphatase (ppaC) | 33363/33300 | 4.6/4.67 | Cytoplasmic | 0.4930 |
| Protein Folding | | | | |  |
| A0A0T9I7B3 | Chaperone protein DnaK (dnaK) | 64828/64800 | 4.63/4.77 | Cytoplasmic | 0.6240 |
| Q6VB96 | 60 kDa chaperonin | 51759/51700 | 4.73/4.81 | Cytoplasmic | 0.4634 |
| Cell wall biogenesis/degradation | | | | |  |
| A0A6G2IR92 | Endolytic murein transglycosylase (mltG) | 65456/65400 | 4.89/4.98 | Membrane | 0.5480 |
| Virulence factors | | | | |  |
| A0A4J1SVM8 | Zinc metalloprotease ZmpB (ZmpB) | 231923/231800 | 5.13/5.22 | Membrane | 0.5433 |
| A0A0T8C4E0 | Pyruvate oxidase (spxB) | 65306/65300 | 5.06/5.17 | Membrane | 0.4584 |
| A0A655H8C4 | Aminopeptidase (pepC) | 50202/50200 | 5.13/5.26 | Cytoplasmic | 0.5158 |
| A0A4F7B299 | Aminopeptidase (pepN) | 95266/95200 | 4.80/4.93 | Cytoplasmic | 0.4093 |
| A0A0C4FRC3 | Lipoprotein | 34707/34700 | 5.02/5.15 | Membrane | 0.6529 |
| A0A4J0IYA2 | Peptidase M13 superfamily (pepO) | 71933/71900 | 4.72/4.83 | Cytoplasmic | 0.3083 |
| A0A6I3U0Y2 | Aminopeptidase | 45197/45200 | 4.87/4.98 | Cytoplasmic | 0.4828 |
| C7U314 | PavB protein (pavB) | 107175/107100 | 5.31/5.48 | Membrane | 0.6739 |
| A0A4J1RMQ0 | Pneumococcal surface protein PspA (pspA) | 70059/70000 | 6.36/6.58 | Extracellular | 0.6650 |
| A0A0H2ZQA9 | Aminopeptidase PepS (pepS) | 45162/45100 | 4.83/4.94 | Cytoplasmic | 0.4504 |
| A0A0T7ZN39 | Trypsin-like serine protease (htrA) | 41829/41800 | 6.15/6.58 | Membrane | 0.7065 |
| A0A822Q4K7 | Oligoendopeptidase F (pepF1_1) | 68664/68600 | 4.71/4.86 | Cytoplasmic | 0.3057 |
| Unknown | | | | |  |
| A0A0B7LWH7 | DUF1002 domain-containing protein | 35387/35400 | 5.46/5.64 | Unknown | 0.5345 |
| A0A654UDF4 | Transposase | 10293/10300 | 4.87/4.87 | Cytoplasmic | 0.9217 |
| A0A4J1UFY1 | Involucrin | 86362/86300 | 13.94/13.93 | Unknown | 0.4640 |

**A protein was considered as antigenic by VaxiJen if its score was equal to or higher than 0.5.**
